# Supplementary material for: An ultrasensitive electrochemical cytosensor for highly specific detection of HL-60 cancer cells based on metal ion functionalized titanium phosphate nanospheres
Source: Royal Society of Chemistry journal article supplement (doi:10.1039/c8an01327f), 2018-01-01
Supplement: c8an01327f1.pdf [file c8an01327f1.pdf]

**Ultrasensitive electrochemical cytosensor for highly specific detection of HL-60 cancer cells based on metal ion functionalized titanium phosphate nanospheres**

Panpan Sun<sup>a</sup>, Wei-Wei Xiong<sup>c</sup>, Dong Zhu<sup>a</sup>, Zhuhua Dong<sup>a</sup>, Xuping Jin<sup>a</sup>, Beibei Liu<sup>a</sup>, Yi Zhang<sup>a</sup>, Beihua Bao<sup>a</sup>, Weifeng Yao<sup>a</sup>, Li Zhang<sup>a,b,\*</sup> and Fang-Fang Cheng<sup>a\*</sup>

<sup>a</sup> School of Pharmacy, Nanjing University of Chinese Medicine, Nanjing 210023, PR China

<sup>b</sup> School of Hanlin, Nanjing University of Chinese Medicine, Taizhou 225300, PR China

<sup>c</sup> Key Laboratory of Flexible Electronics (KLOFE) & Institute of Advanced Materials (IAM), Jiangsu National Synergetic Innovation Center for Advanced Materials (SICAM), Nanjing Tech University (Nanjing Tech), 30 South Puzhu Road, Nanjing 211816, PR China

\* Authors to whom correspondence should be addressed;

Email: [ffcheng@njucm.edu.cn](mailto:ffcheng@njucm.edu.cn) (F.-F. Cheng); [zhangli@njucm.edu.cn](mailto:zhangli@njucm.edu.cn) (L. Zhang)

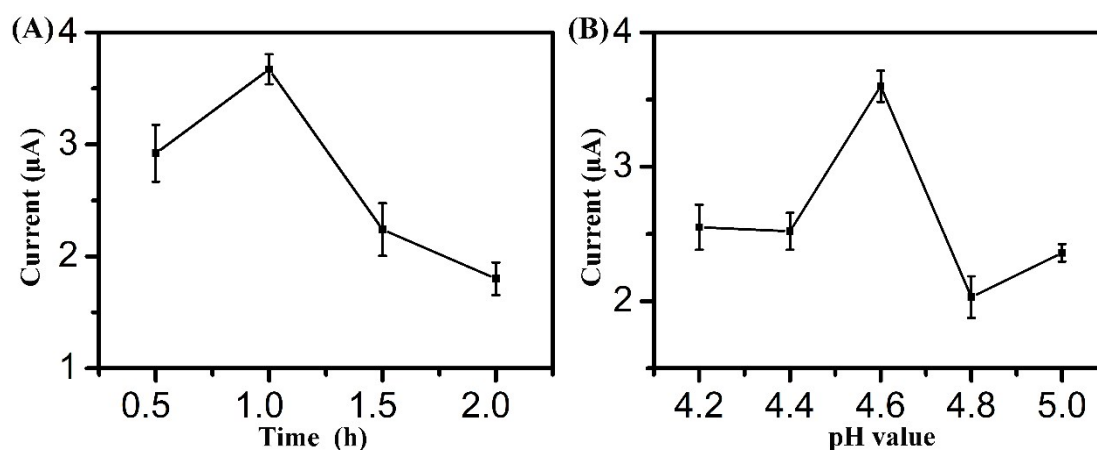

Figure S1. Effects of cell incubation time (A) and pH value (B)

**Table S1 Detection limits of various cytosensors**

|          | <b>Signal Probes</b>                                                                                             | <b>Cell Types</b> | <b>LOD</b>                                             | <b>Linear range</b>                                          | <b>Ref</b>   |
|----------|------------------------------------------------------------------------------------------------------------------|-------------------|--------------------------------------------------------|--------------------------------------------------------------|--------------|
| <b>1</b> | Fe <sub>3</sub> O <sub>4</sub> /MnO <sub>2</sub> /Au@Pd nanoelectrocatalysts and enzyme for signal amplification | HepG2             | 15 cells mL <sup>-1</sup>                              | 1×10 <sup>2</sup> ~ 1×10 <sup>7</sup> cells mL <sup>-1</sup> | 3            |
| <b>2</b> | Sgc8c-functionalized cathode and a nitrogen-doped graphene/gold nanoparticles/glucose oxidase anode              | CCRF-CEM          | 4 cells                                                | 5~50000 cells                                                | 40           |
| <b>3</b> | An indium tin oxide electrode array and multifunctional nanoprobe                                                | HepG2             | 10 cells mL <sup>-1</sup>                              | 10 <sup>2</sup> to 10 <sup>7</sup> cells mL <sup>-1</sup>    | 28           |
| <b>4</b> | PNT-CS-modified electrodes using the electrochemical impedance method                                            | K562              | 630 cells mL <sup>-1</sup>                             | 5×10 <sup>3</sup> ~5×10 <sup>7</sup> cells mL <sup>-1</sup>  | 22           |
| <b>5</b> | Fe <sub>3</sub> O <sub>4</sub> @Ag-Pd Nanoelectrocatalysts for signal amplification                              | MCF-7<br>T47D     | 34 cells mL <sup>-1</sup><br>42 cells mL <sup>-1</sup> | 50~1 × 10 <sup>7</sup> cells mL <sup>-1</sup>                | 29           |
| <b>6</b> | Peroxidase-mimetic Au nanoflower decorated graphene-hemin composite                                              | K562              | 10 cells mL <sup>-1</sup>                              | 10~5.0× 10 <sup>4</sup> cells mL <sup>-1</sup>               | 24           |
| <b>7</b> | Cd <sup>2+</sup> ion functionalized titanium phosphate nanospheres for signal amplification                      | HL-60             | 35 cells mL <sup>-1</sup>                              | 10 <sup>2</sup> ~ 1×10 <sup>7</sup> cells mL <sup>-1</sup>   | present work |

Table S2 The reliability of the proposed method applied in detection of HL-60 in human serum

| Concentration of Added HL-60 cells (cells/mL) | Measured concentration of HL-60 cells (cells/mL) | Relative error % |
|-----------------------------------------------|--------------------------------------------------|------------------|
| Blank                                         | 7                                                | —                |
| 500                                           | 549±12                                           | 9.8              |
| 1000                                          | 1073±184                                         | 14.6             |
| 5000                                          | 4530±737                                         | 9.4              |
| 10000                                         | 10410±1694                                       | 4.1              |

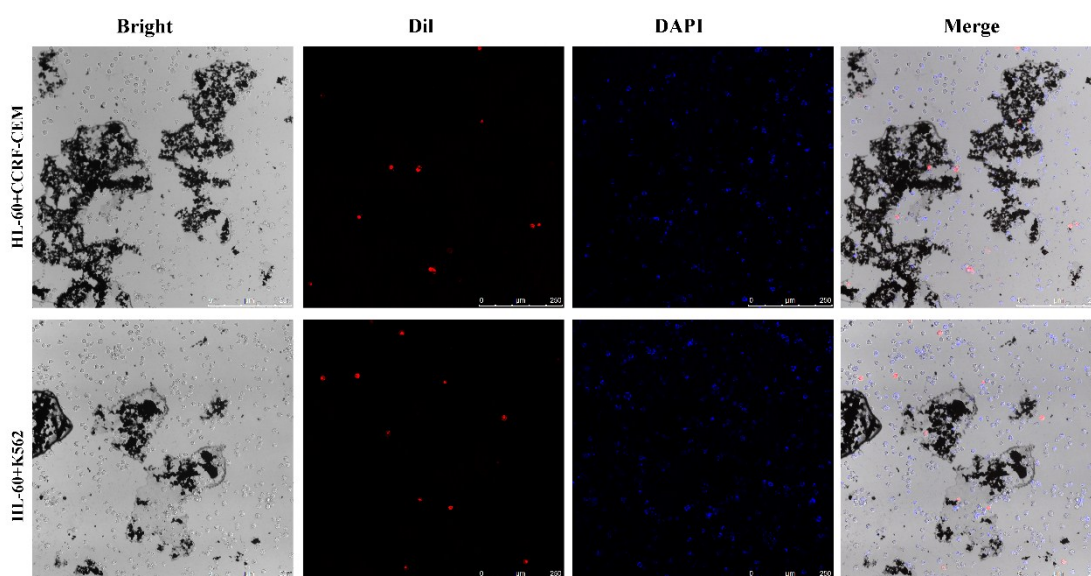

Figure S2 Fluorescence microscopy images of (A) CCRF-CEM cells stained by Dil and HL-60 cells stained by DAPI, and (B) K562 cells stained by Dil and HL-60 cells stained by DAPI captured on KH1C12/c-MWNT observed under confocal fluorescence microscope.

Carboxyl-MWNT was modified on the bottom of petri dish, and the KH1C12 was attached to the c-MWNT. BSA was used to remove unattached KH1C12. 1 mL culture solution containing  $4 \times 10^4$  HL-60 cells stained with DAPI ( $\lambda_{ex}=364$  nm,  $\lambda_{em}=454$  nm) and  $4 \times 10^4$  CCRF-CEM cells (or K562 cells) stained with Dil ( $\lambda_{ex}=549$  nm,  $\lambda_{em}=565$  nm) were observed under confocal fluorescence microscope/Inverted Fluorescence microscope. As Figure S2 showed little CCRF-CEM cells or K562 cells was captured by KH1C12/c-MWNT, indicating the excellent specificity of our present cytosensor.
